# Supplementary material
Source: PubMed Central journal article supplement (PMC6397698)
Supplement: NIHMS1517497-supplement-1.pdf [file NIHMS1517497-supplement-1.pdf]

**A**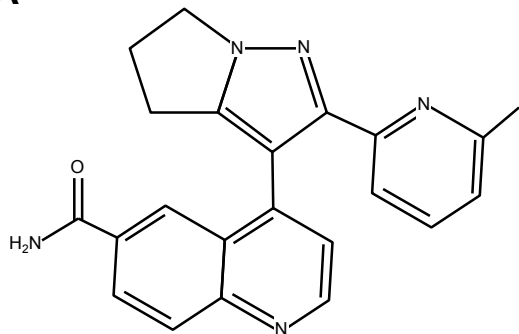Galunisertib: C<sub>22</sub>H<sub>19</sub>N<sub>5</sub>O**B**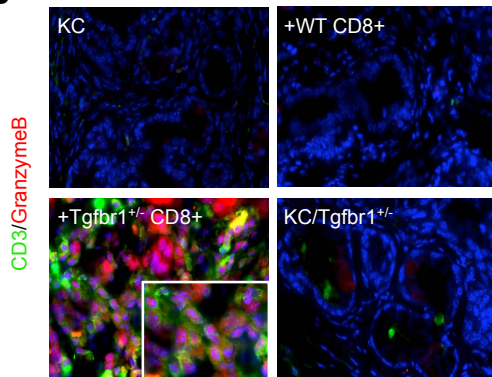**C**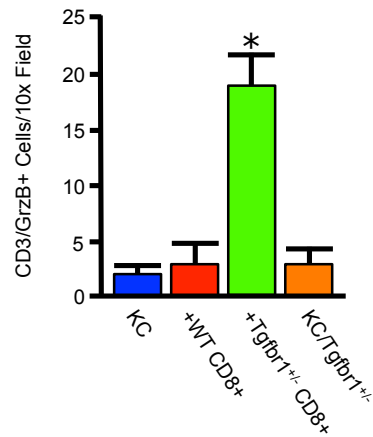

### Figure S1. Transferred TGFBR1-Deficient CTLs produce GranzymeB in the pancreas tumor microenvironment

**(A)** Chemical structure of the TGFBR1 inhibitor Galunisertib (LY2157299). **(B)** P48-Cre x LSL-KRAS<sup>G12D</sup> (KC) mice were generated to target conditional expression of oncogenic KRAS<sup>G12D</sup> to the exocrine pancreas. Mice were allowed to develop neoplastic disease, and subsequently administered either 2x10<sup>6</sup> wild type (WT CD8<sup>+</sup>) or TGFBR1-deficient (Tgfr1<sup>+/-</sup> CD8<sup>+</sup>) CD8<sup>+</sup> T-cells retroorbital injection. Similarly, KC mice crossed to *Tgfr1* haplo-insufficient animals (KC/Tgfr1<sup>+/-</sup>). Tissues were collected and dual stained with CD3 and GranzymeB. **(C)** CD3/GranzymeB dual positive cells were quantified by two investigators and averages displayed ± S.E.M. (\*p < 0.05, N=3-6/group).
