# Supplementary material
Source: PubMed Central journal article supplement (PMC6397698)
Supplement: NIHMS1517497-supplement-2.pdf [file NIHMS1517497-supplement-2.pdf]

**A** Adjacent Normal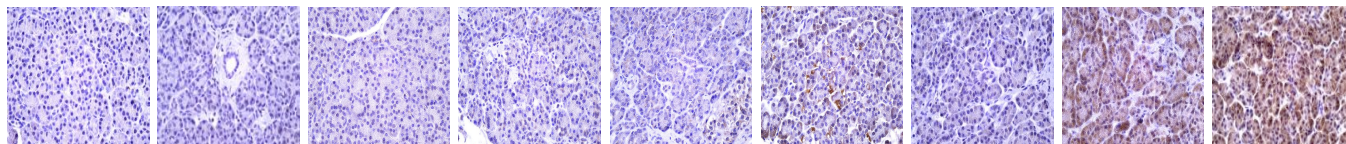**B** PDAC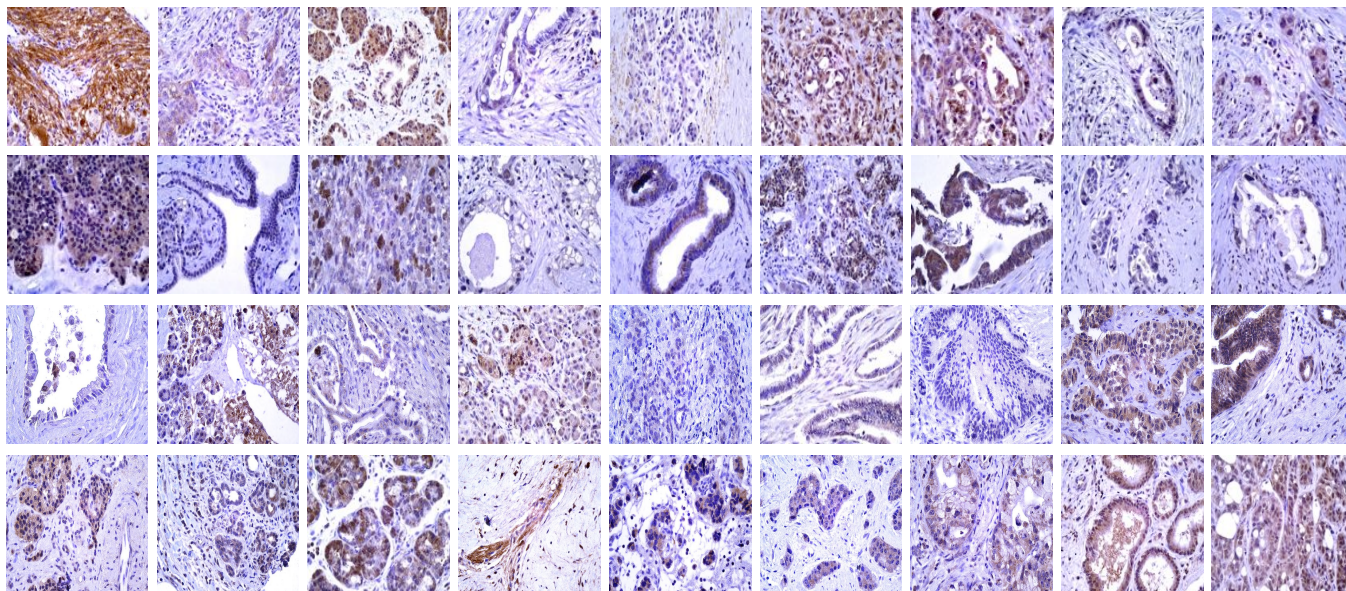**C**

| Expressing | Non-Expressing |
|------------|----------------|
| 2/14       | 12/14          |
| 14%        | 86%            |

Adjacent Normal

**D**

| Expressing | Non-Expressing |
|------------|----------------|
| 26/44      | 18/44          |
| 59%        | 41%            |

PDAC

**E**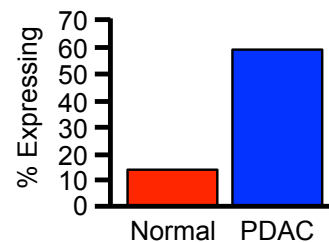**Figure S2. PD-L1 is upregulated in the pancreatic tumor microenvironment**

**(A)** Representative images of 14 adjacent normal and **(B)** 44 pancreatic ductal adenocarcinoma (PDAC) patient samples stained for PD-L1 by immunohistochemistry. **(C)** 2/14 of the normal and **(D)** 26/44 of PDAC sections stained positive for PD-L1. **(E)** Percent of normal and PDAC sections positive for PD-L1 expression.
