# Supplementary material
Source: PubMed Central journal article supplement (PMC6397698)
Supplement: NIHMS1517497-supplement-3.pdf [file NIHMS1517497-supplement-3.pdf]

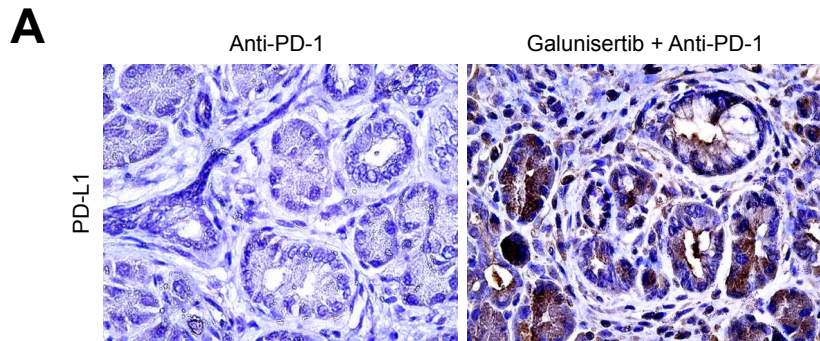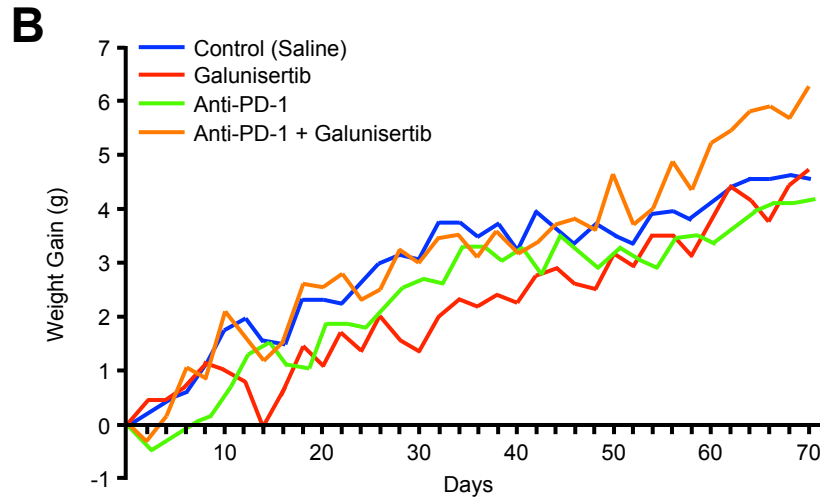

**Figure S3. Galunisertib and anti-PD-1 dual treatment increases PD-L1 expression and promotes healthy weight gain**

**(A)** Pdx1-Cre x LSL-KRAS<sup>G12D</sup> x LSL-TP53<sup>R172H</sup> (KPC) mice were regenerated as a model of aggressive PDAC. At 6 weeks of age, mice were administered intraperitoneal injection every other day either a PBS vehicle (Control), 75 mg/kg of the TGFBR1 inhibitor Galunisertib, 200  $\mu$ g of an anti-PD-1 neutralizing antibody (anti-PD-1), or a combination of Galunisertib and anti-PD-1. At the conclusion of the study, tissues were collected and stained for PD-L1 by immunohistochemistry. **(B)** Mean increase in body weight from mice across all treatment groups displayed  $\pm$  S.E.M.
