# Supplementary material
Source: PubMed Central journal article supplement (PMC6397698)
Supplement: NIHMS1517497-supplement-5.pdf [file NIHMS1517497-supplement-5.pdf]

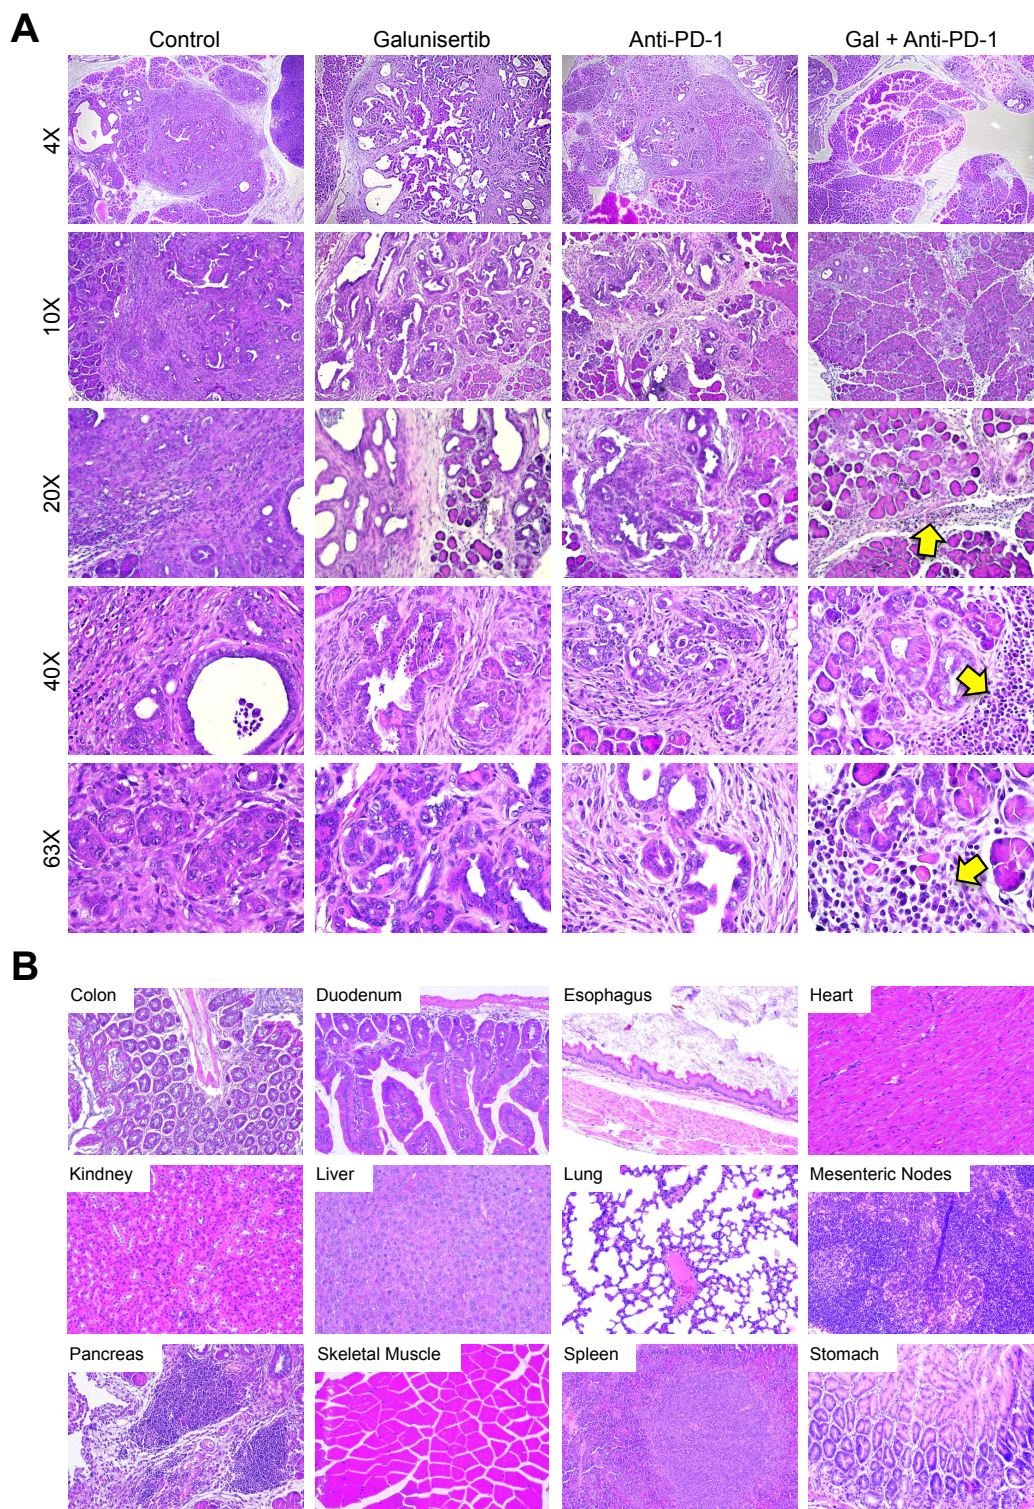

**Figure S5. Additional histology from Galunisertib and/or anti-PD-1 treated mice**

**(A)** Pdx1-Cre x LSL-KRAS<sup>G12D</sup> x TP53<sup>R172H</sup> (KPC) mice were treated with either a PBS vehicle (Control), Galunisertib, anti-PD-1, or Galunisertib and anti-PD-1 as described. Tissue sections were then stained with H&E and representative images shown for 4X, 10X, 20X, 40X, and 63X high power fields. While monotreated mice were histologically indistinct from the control with dense fibrosis and a poor immune cell infiltrate, Galunisertib and anti-PD-1 dual-treated mice displayed near complete regression of disease hallmarked by overwhelming lymphocytosis in remaining areas of disease (yellow arrows). **(B)** Tissue sections of additional organs from Galunisertib and anti-PD-1 dual-treated mice were evaluated for signs of autoimmunity or toxicity, which all displayed normal histology and failed to show lymphocytosis in any organ other than the pancreas, suggesting limited toxicity of this approach in mice.
