# Supplementary material
Source: PubMed Central journal article supplement (PMC6397698)
Supplement: NIHMS1517497-supplement-7.pdf [file NIHMS1517497-supplement-7.pdf]

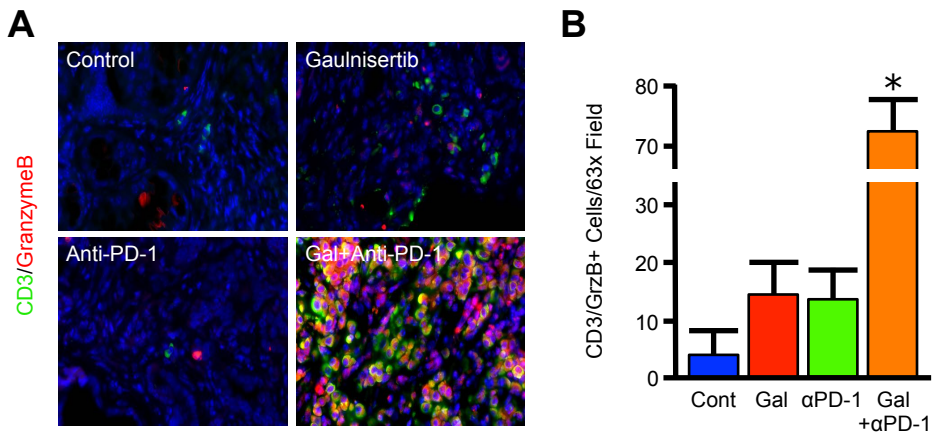

**Figure S7. Galunisertib and anti-PD-1 dual treatment promotes GranzymeB production in tumor infiltrating CTLs**

**(A)** Pdx1-Cre x LSL-KRAS<sup>G12D</sup> x TP53<sup>R172H</sup> (KPC) mice were treated with Galunisertib, and/or anti-PD-1 as described and tissues stained for both CD3 and GranzymeB. **(B)** CD3 and GranzymeB dual-positive cells were quantified per high power field and averages displayed ± S.E.M. (\*p < 0.05, N≤3/group).
